# Supplementary material for: Analysis of 15 anti-obesity drugs in urine using thermal-assisted paper spray mass spectrometry
Source: Royal Society of Chemistry journal article supplement (doi:10.1039/d3ay00559c), 2023-01-01
Supplement: d3ay00559c1.pdf [file d3ay00559c1.pdf]

Supporting Information

## **Analysis of 15 anti-obesity drugs in urine using thermal-assisted paper spray mass spectrometry**

Shijia Jiang <sup>a, b, †</sup>, Junbo Zhao <sup>a, †</sup>, Hui Yan <sup>a</sup>, Ping Xiang <sup>a</sup> and Min Shen <sup>a, \*</sup>

<sup>a</sup> *Department of Forensic Toxicology, Shanghai Key Laboratory of Forensic Medicine, Shanghai Forensic Service Platform, Academy of Forensic Science, Shanghai, 200063, China*

<sup>b</sup> *Criminal Justice College, East China University of Political Science and Law, Shanghai 200042, China*

<sup>\*</sup> *Corresponding author*

<sup>†</sup> *Equal contribution*

**Table S1.** Accurate mass identification for the major ionic species of anti-obesity drugs

| Analyte                 | Ion<br>Composition       | Accurate mass |              | Error<br>(ppm) |
|-------------------------|--------------------------|---------------|--------------|----------------|
|                         |                          | Theoretical   | Experimental |                |
| Sibutramine             | $C_{17}H_{27}ClN^+$      | 280.18265     | 280.18314    | 1.75           |
| Cathinone               | $C_9H_{12}NO^+$          | 150.09134     | 150.09103    | -2.07          |
| Desmethyl Sibutramine   | $C_{16}H_{25}ClN^+$      | 266.16700     | 266.16730    | 1.13           |
| Mazindol                | $C_{16}H_{14}ClN_2O^+$   | 285.07892     | 285.07965    | 2.56           |
| Amfepramone             | $C_{13}H_{20}NO^+$       | 206.15394     | 206.15398    | 0.19           |
| Didesmethyl Sibutramine | $C_{15}H_{23}ClN^+$      | 252.15135     | 252.15230    | 3.77           |
| Fenfluramine            | $C_{12}H_{17}F_3N^+$     | 232.13076     | 232.13101    | 1.08           |
| Fluoxetine              | $C_{17}H_{19}F_3NO^+$    | 310.14133     | 310.14206    | 2.35           |
| Phendimetrazine         | $C_{12}H_{18}NO^+$       | 192.13829     | 192.13834    | 0.26           |
| Phenmetrazine           | $C_{11}H_{16}NO^+$       | 178.12264     | 178.12276    | 0.67           |
| Norfluoxetine           | $C_{16}H_{17}F_3NO^+$    | 296.12568     | 296.12479    | -3.01          |
| Nordiazepam             | $C_{15}H_{12}ClN_2O^+$   | 271.06327     | 271.06461    | 4.94           |
| Phentermine             | $C_{10}H_{16}N^+$        | 150.12773     | 150.12755    | -1.20          |
| Oxazepam                | $C_{15}H_{12}ClN_2O_2^+$ | 287.05818     | 287.05948    | 4.53           |
| Temazepam               | $C_{16}H_{14}ClN_2O_2^+$ | 301.07383     | 301.07483    | 3.32           |

**Table S2.** Summary of optimal parameters

| <b>Parameter</b>                            | <b>Optimal value</b>           |
|---------------------------------------------|--------------------------------|
| the distance between paper tip and MS inlet | 5 mm                           |
| paper substance                             | Whatman filter paper 1         |
| voltage on paper substance                  | 4.5 kV                         |
| spray solvent                               | MeOH: H <sub>2</sub> O (90:10) |

(a)

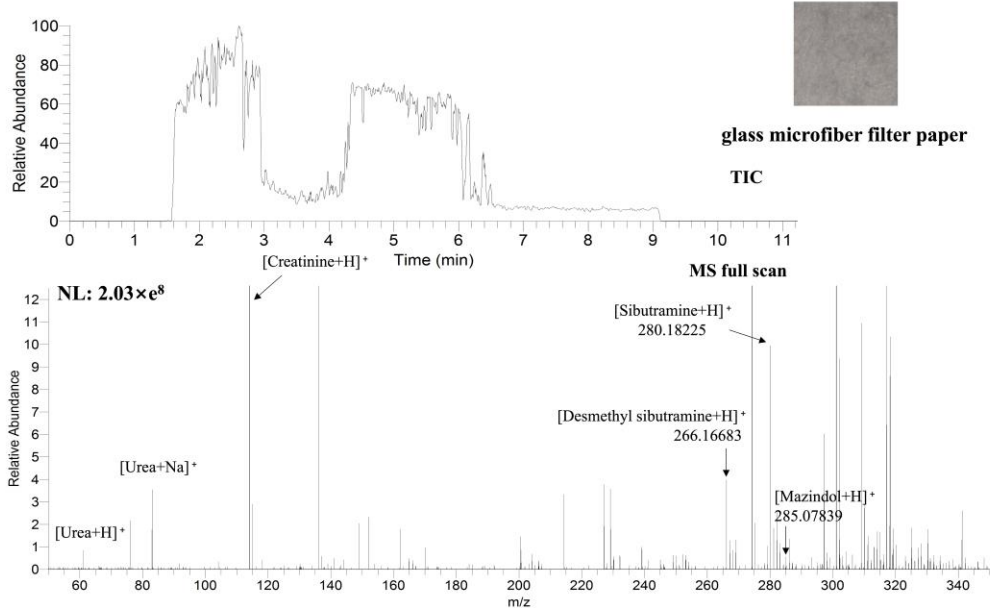

(b)

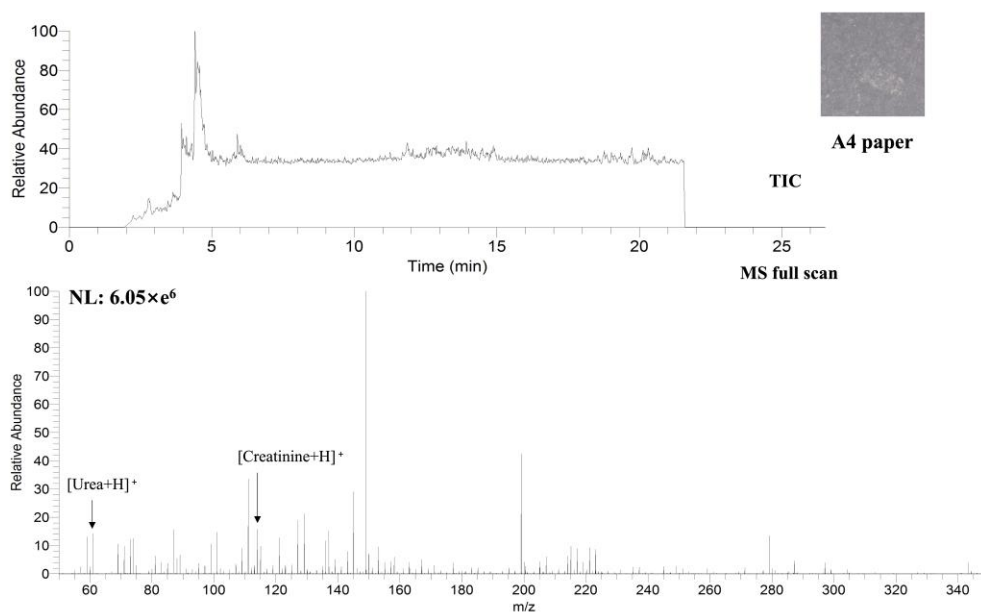

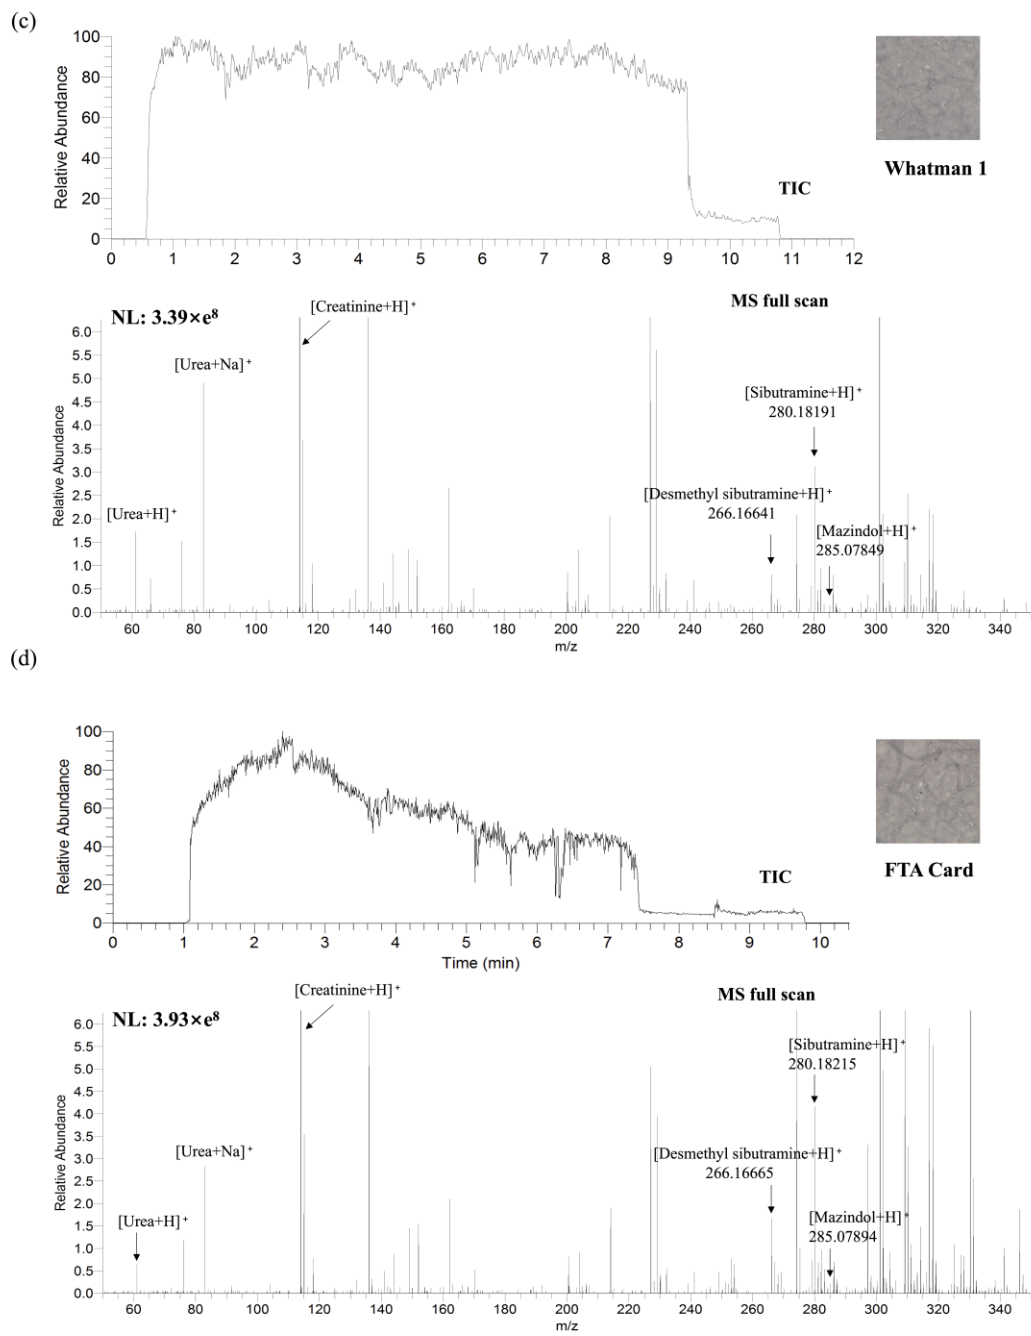

**Fig. S1** The detected intensity, TIC and microstructure of (a) glass microfiber filter paper (47mm in diameter), (b) A4 paper, (c) Whatman1 and (d) FTA<sup>TM</sup> card.

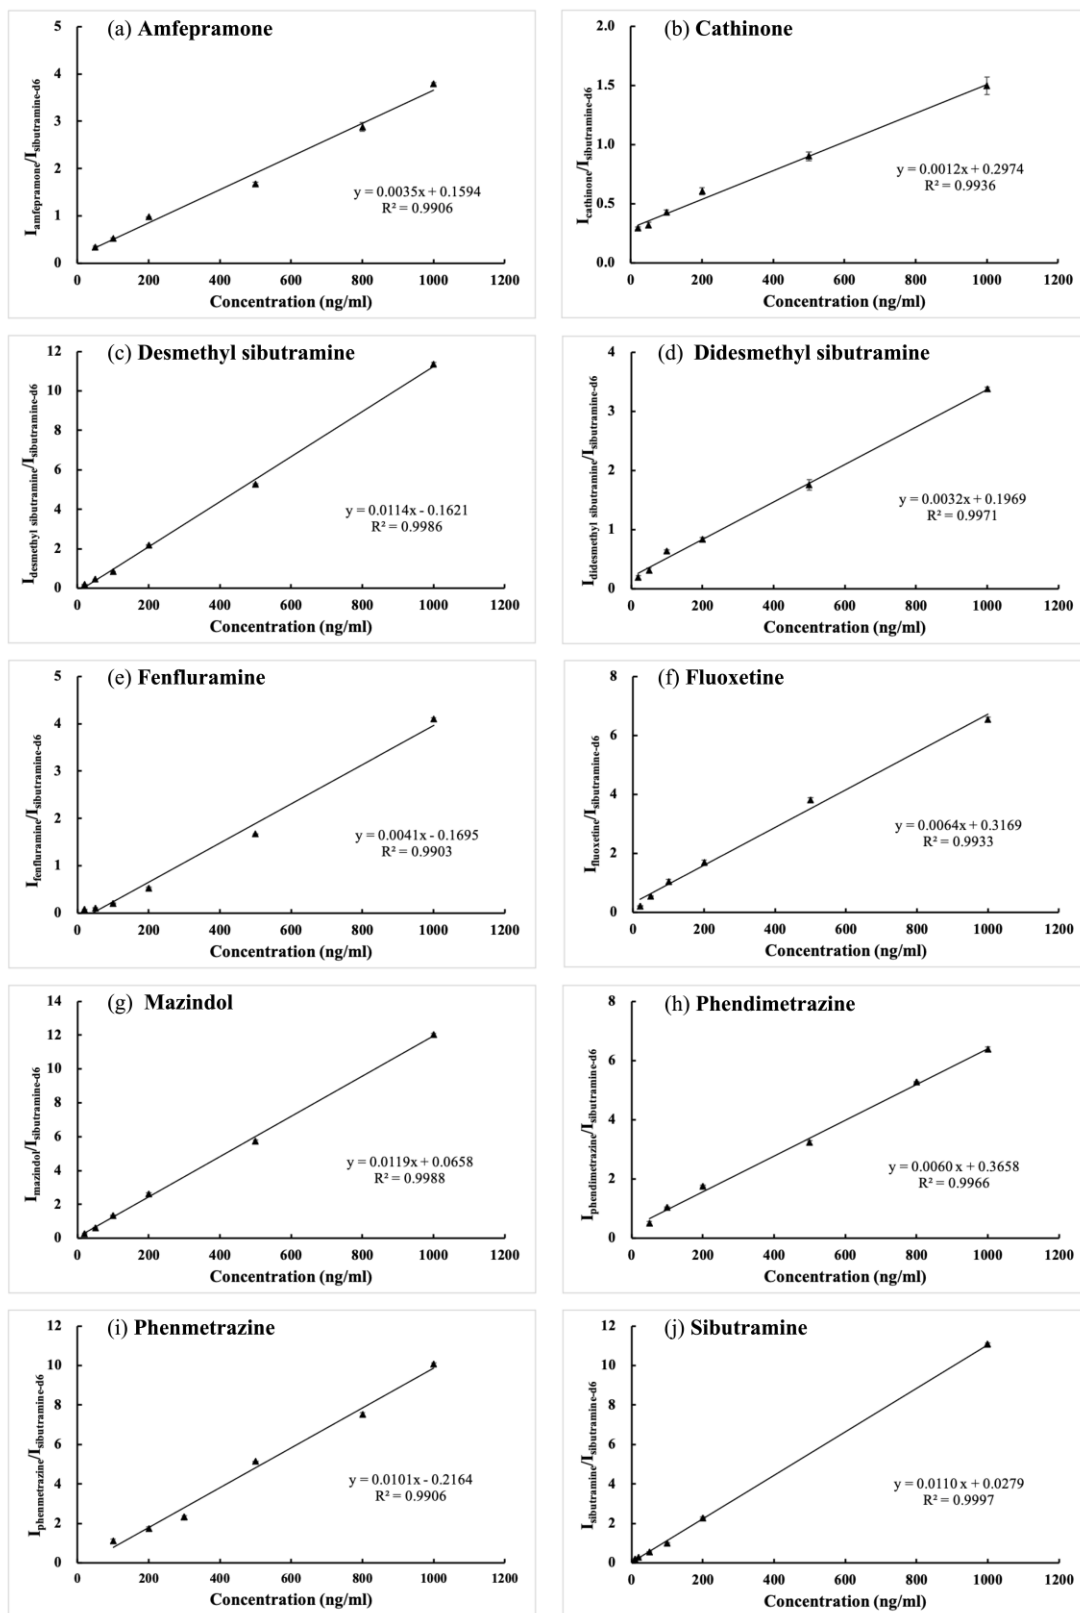

**Fig. S2** Linearity between the concentrations of drugs and the intensity ratios of drugs to sibutramine-d<sub>6</sub>. The error bar represents the standard deviation of samples analyzed in triplicate.
